# Supplementary material for: Short incubation periods of atypical H-type BSE in cattle with EK211 and KK211 prion protein genotypes after intracranial inoculation
Source: Frontiers journal article supplement (doi:10.3389/fvets.2023.1301998), 2023-11-03
Supplement: Data_Sheet_1.PDF [file Data_Sheet_1.PDF]

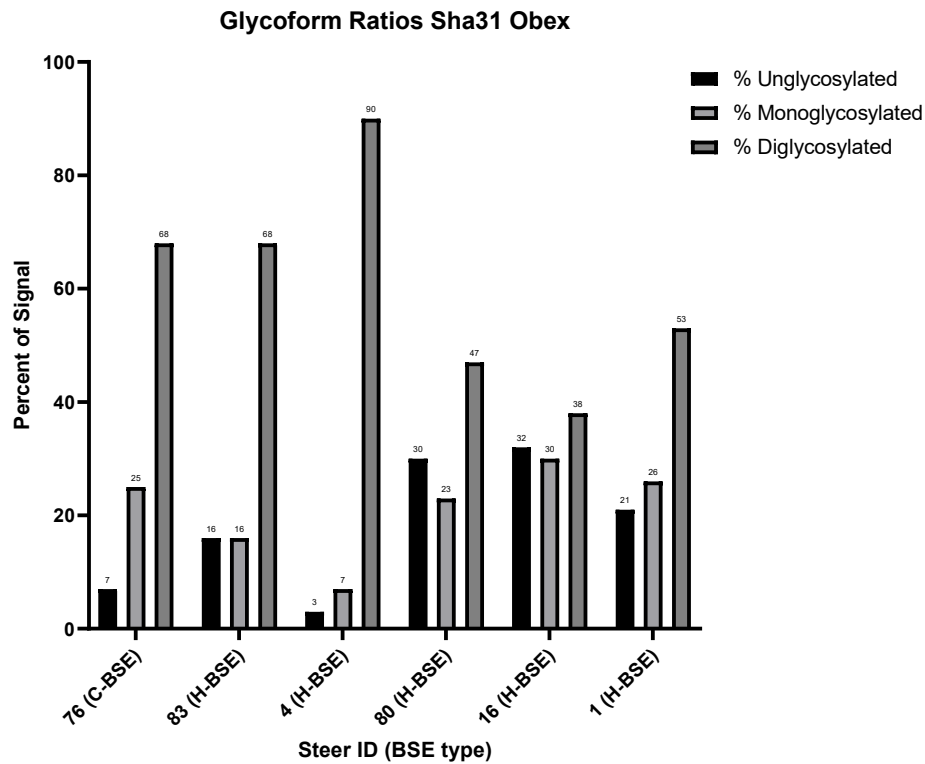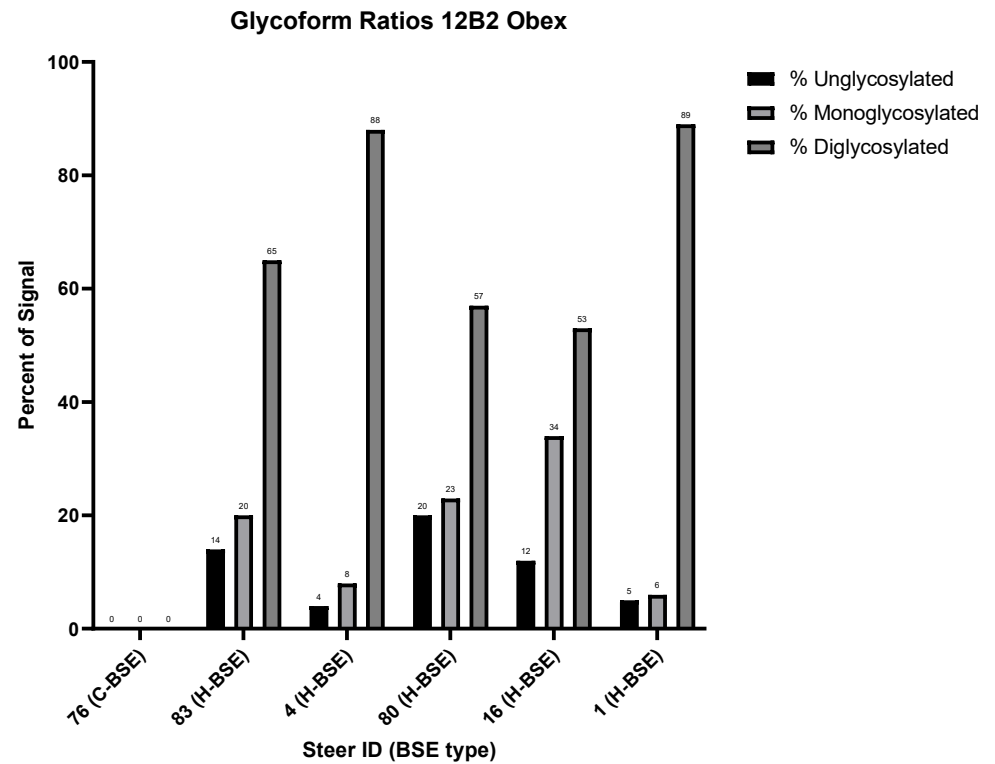

**Supplementary Figure 1.** Graphs displaying the percentage of immunolabeling for each band in a given BSE sample. Percentages were calculated from the signal density after local background subtraction measured using iBright Analysis Software (Thermofisher Scientific).
