# Supplementary material for: Short incubation periods of atypical H-type BSE in cattle with EK211 and KK211 prion protein genotypes after intracranial inoculation
Source: Frontiers journal article supplement (doi:10.3389/fvets.2023.1301998), 2023-11-03
Supplement: Data_Sheet_3.PDF [file Data_Sheet_3.PDF]

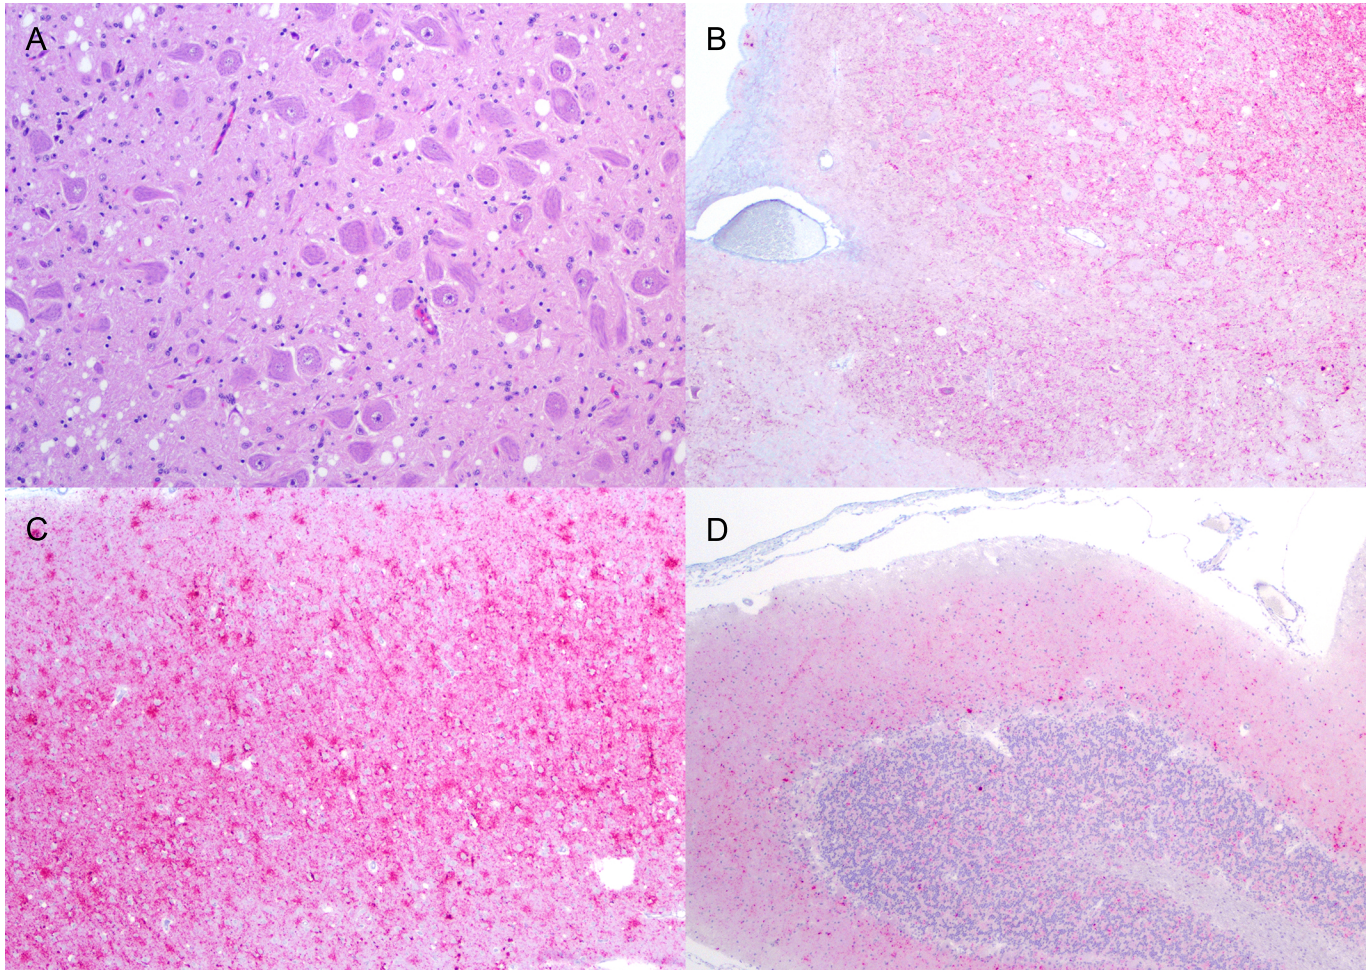

**Supplementary Figure 3.** Photomicrographs of brain from steers affected by H-BSE originating from the E211K H-BSE 2006 case. (A) Spongiform encephalopathy in the brainstem at the level of the obex in a EE211 steer. (B) Immunohistochemistry for PrP<sup>Sc</sup> (red) in a KK211 steer. (C) Immunolabeling (red) for PrP<sup>Sc</sup> in the cerebrum of a KK211 steer. (D) Cerebellum with immunopositive labeling (red) in a EE211 steer.
